# Supplementary material for: Clinical value of lncRNA CCAT1 in serum extracellular vesicles as a potential biomarker for gastric cancer
Source: PubMed Central journal article supplement — Oncol Lett. 2021 Apr 6;21(6):447. doi: 10.3892/ol.2021.12708 (PMC8045156; doi:10.3892/ol.2021.12708), 2021-04-06

Figure S1. Expression of exosome lncRNA CCAT1 in blood based on the online database exoRBase. RNA sequencing data analysis revealed that exosome CCAT1 in the blood was upregulated in PAAD compared with that in healthy subjects. lncRNA CCAT, long non-coding RNA colon cancer-associated transcript 1; HS, healthy subject; CHD, coronary heart disease; CRC, colorectal cancer; HCC, hepatocellular carcinoma; PAAD, Pancreatic adenocarcinoma; WhB, whole blood; TPM, transcripts per million.

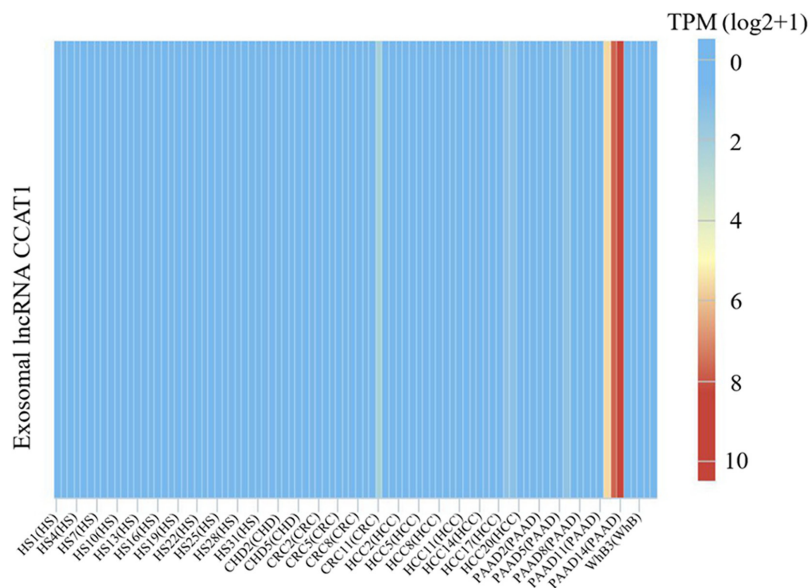

Figure S2. Expression levels of lncRNA CCAT1 in serum EVs. EVs were isolated from patient serum and divided into three groups that were untreated (control), treated with RNase A or co-treated with RNase A and 0.1% Triton X-100. LncRNA CCAT1 expression was detected via reverse transcription-quantitative PCR. Data are presented as the mean  $\pm$  SD of three independent experiments. EVs, extracellular vesicles; lncRNA, long non-coding RNA; CCAT, colon cancer-associated transcript 1.

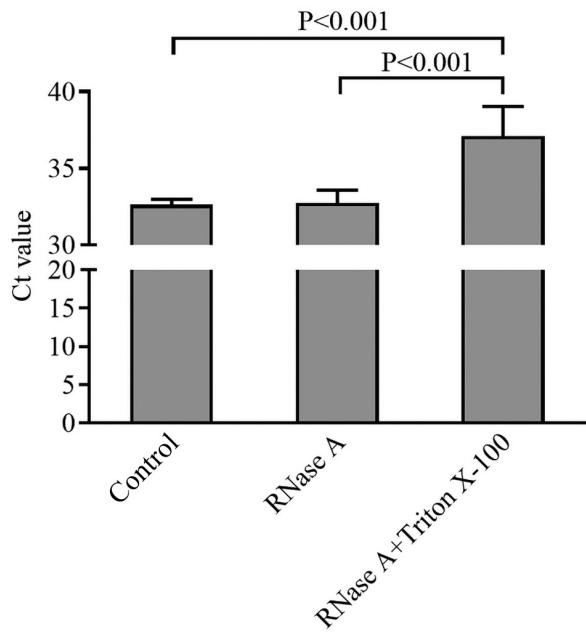

Figure S3. Stability of lncRNA CCAT1 in serum EVs in harsh environments. (A and B) CCAT1 was detected by reverse transcription-quantitative PCR in EVs isolated from serum samples (A) stored for 24 or 48 h at room temperature or at 4°C (fresh serum collected and stored for 2 h was used as the control), or (B) freeze-thawed for 1-3 cycles at -80°C. Data are presented as the mean  $\pm$  SD of three independent experiments. EVs, extracellular vesicles; lncRNA, long non-coding RNA; CCAT, colon cancer-associated transcript 1.

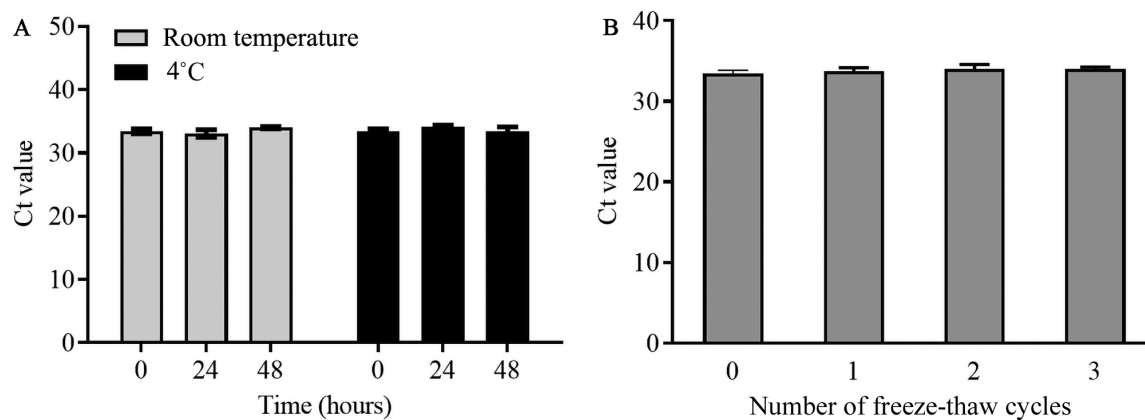

Figure S4. Expression levels of lncRNA CCAT1 in the EVs of gastric cancer tissue and serum. (A) Expression of lncRNA CCAT1 in gastric cancer tissues and adjacent normal gastric tissues. (B) The correlation between lncRNA CCAT1 in serum EVs and gastric cancer tissue. EVs, extracellular vesicles; lncRNA, long non-coding RNA; CCAT, colon cancer-associated transcript 1.

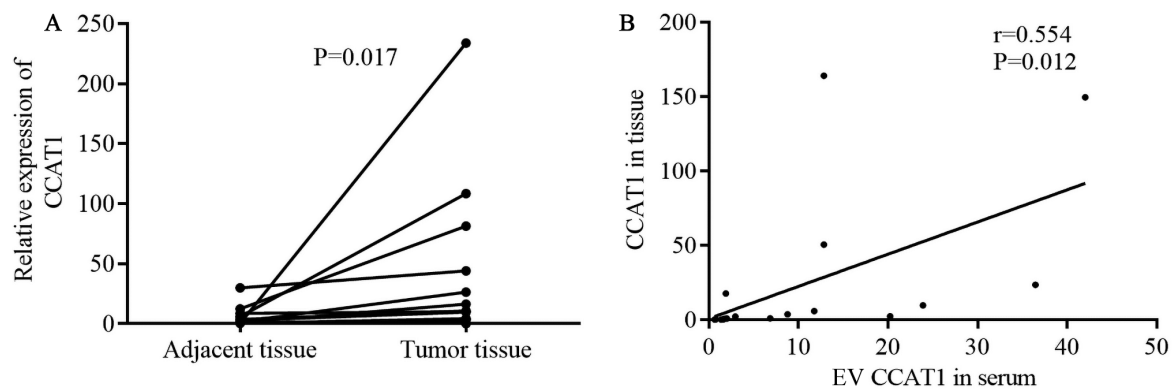

Supplement: Supplementary_Data.pdf [file Supplementary_Data.pdf]
